# Supplementary material for: A high-performance wearable pressure sensor based on an MXene/PVP composite nanofiber membrane for health monitoring
Source: Royal Society of Chemistry journal article supplement (doi:10.1039/d2na00339b), 2022-01-01
Supplement: d2na00339b1.pdf [file d2na00339b1.pdf]

## Supporting Information

### **A high-performance wearable pressure sensor based on MXene/PVP composite nanofiber membrane for health monitoring**

*Mengna Ren,<sup>1,#</sup> Zhongsen Sun,<sup>1,#</sup> Mengqi Zhang,<sup>1</sup> Xiaojun Yang,<sup>1</sup> Dedong Guo,<sup>1</sup> Shuheng Dong,<sup>1</sup> Rajendra Dhakal,<sup>2</sup> Zhao Yao,<sup>1,\*</sup> Yuanyue Li<sup>1,\*</sup> and Nam Young Kim<sup>3</sup>*

*<sup>1</sup>College of Electronic and Information, Qingdao University, Qingdao 266071, China*

*<sup>2</sup>Department of Computer Science and Engineering, Sejong University, Seoul 05006, Korea*

*<sup>3</sup>Department of Electronic Engineering, Kwangwoon University, Seoul 01897, Korea*

---

<sup>#</sup>These authors contributed equally to this work.

\*corresponding author: [yzh17@qdu.edu.cn](mailto:yzh17@qdu.edu.cn) (Zhao Yao); [yyli@qdu.edu.cn](mailto:yyli@qdu.edu.cn) (Yuanyue Li)

### 1. Figure S1

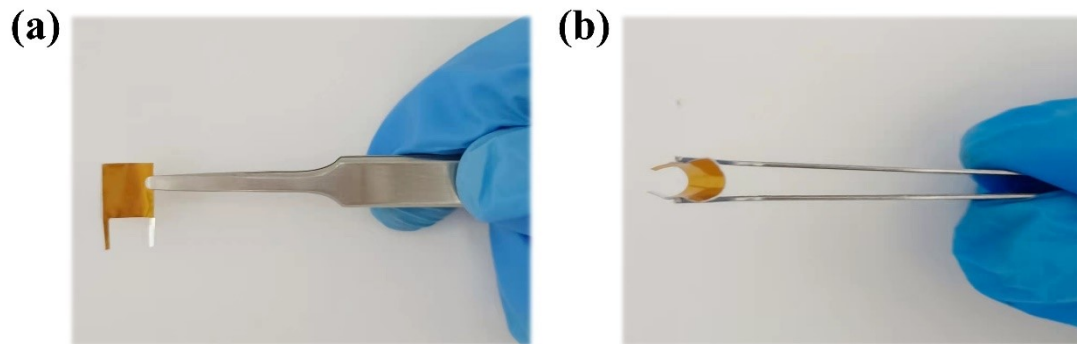

**Fig. S1.** The physical (a) and bending (b) diagrams of the  $1 \times 1 \text{ cm}^2$  capacitive pressure sensor based on MXene/PVP CNM, respectively.

### 2. Figure S2

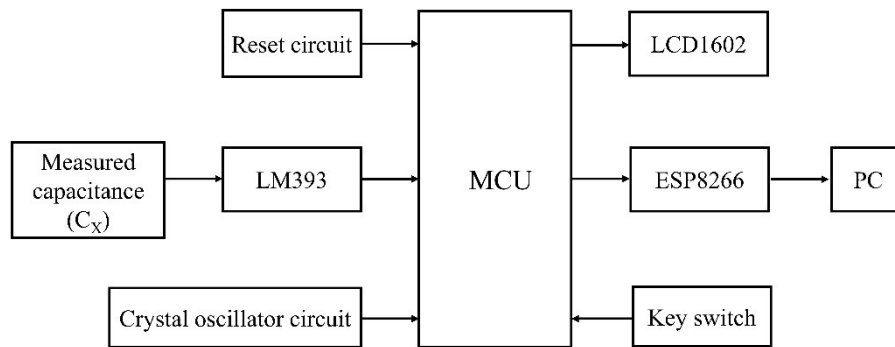

**Fig. S2.** Flow chart of the capacitance measurement of the sensor array.

### 2. Figure S3

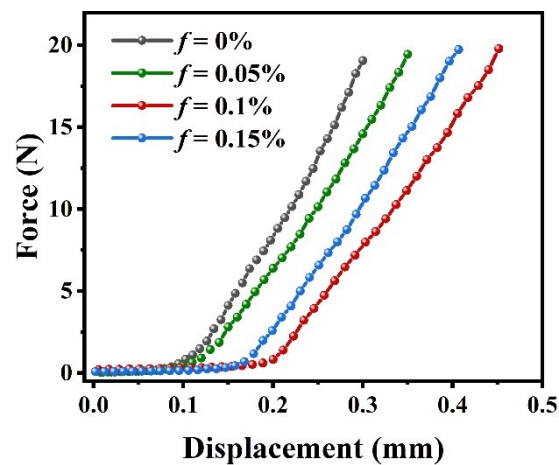

**Fig. S3.** Compressive force-displacement performance of the sensors.

### 3. Figure S4

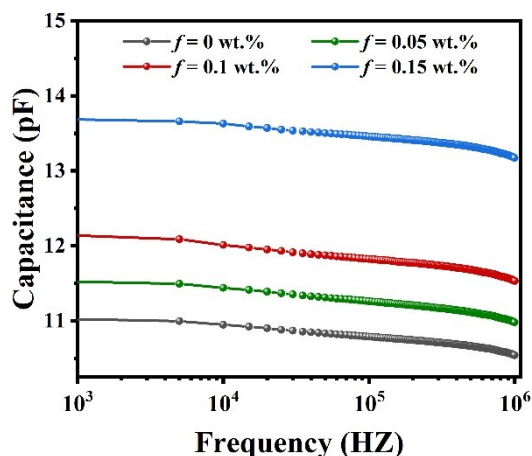

Fig. S4. Frequency dependence of the initial capacitance  $C_0$  of the sensors.

#### 4. Figure S5

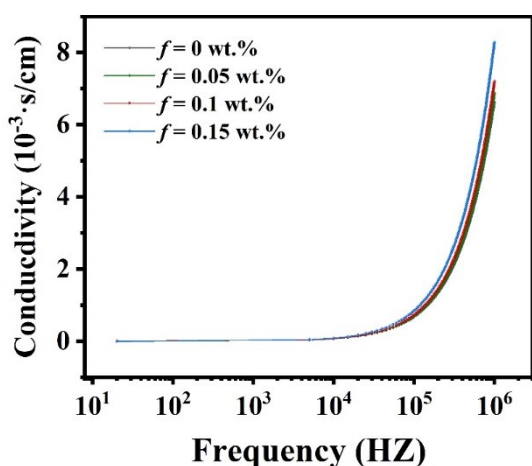

Fig. S5. The conductivity of MXene/PVP CNM varies with the frequency.

#### 5. Details of the sensor array

The  $4 \times 4$  sensor array designed in this work has a total of 16 pixels, and each pixel is numbered as shown in Fig. S6. The letters T, L, O and P are placed on the  $4 \times 4$  array, respectively. The relative capacitance changes at each position can be viewed from Table S1-S4.

|   |   |    |    |
|---|---|----|----|
| 1 |   |    | 13 |
|   | 6 |    |    |
|   |   | 11 |    |
| 4 |   |    | 16 |

Fig. S6. The  $4 \times 4$  position sequence of the sensor array.

**Table S1.** Relative capacitance change at each pixel in the  $4 \times 4$  microarray by placing the letter “T”.

| Position | Initial capacitance (pF) | Loading capacitance (pF) | $\Delta C/C_0$ |
|----------|--------------------------|--------------------------|----------------|
| 1        | 7.6703                   | 8.2373                   | 0.0739         |
| 2        | 7.5768                   | 7.5768                   | 0              |
| 3        | 6.5653                   | 6.5653                   | 0              |
| 4        | 7.0830                   | 7.0830                   | 0              |
| 5        | 8.1048                   | 8.7192                   | 0.0758         |
| 6        | 7.2224                   | 7.8620                   | 0.0885         |
| 7        | 7.2532                   | 7.7930                   | 0.0744         |
| 8        | 7.9840                   | 8.3580                   | 0.0468         |
| 9        | 7.2134                   | 7.7433                   | 0.0734         |
| 10       | 7.5645                   | 7.5645                   | 0              |
| 11       | 7.9935                   | 7.9935                   | 0              |
| 12       | 6.9388                   | 6.9388                   | 0              |
| 13       | 7.5485                   | 7.5485                   | 0              |
| 14       | 7.9100                   | 7.9100                   | 0              |
| 15       | 8.1150                   | 8.1150                   | 0              |
| 16       | 7.0423                   | 7.0423                   | 0              |

**Table S2.** Relative capacitance change at each pixel in the 4×4 microarray by placing the letter “L”.

| Position | Initial capacitance (pF) | Loading capacitance (pF) | $\Delta C/C_0$ |
|----------|--------------------------|--------------------------|----------------|
| 1        | 7.6703                   | 8.1075                   | 0.0569         |
| 2        | 7.5768                   | 8.1617                   | 0.0771         |
| 3        | 6.5653                   | 7.0394                   | 0.0722         |
| 4        | 7.0830                   | 7.7698                   | 0.0868         |
| 5        | 8.1048                   | 8.1048                   | 0              |
| 6        | 7.2224                   | 7.2224                   | 0              |
| 7        | 7.2532                   | 7.2532                   | 0              |
| 8        | 7.9840                   | 8.6886                   | 0.0882         |
| 9        | 7.2134                   | 7.2134                   | 0              |
| 10       | 7.5645                   | 7.5645                   | 0              |
| 11       | 7.9935                   | 7.9935                   | 0              |
| 12       | 6.9388                   | 7.5347                   | 0.08582        |
| 13       | 7.5485                   | 7.5485                   | 0              |
| 14       | 7.9100                   | 7.9100                   | 0              |
| 15       | 8.1150                   | 8.1150                   | 0              |
| 16       | 7.0423                   | 7.0423                   | 0              |

**Table S3.** Relative Capacitance change at each pixel in the 4×4 microarray by placing the letter “O”.

| Position | Initial capacitance (pF) | Loading capacitance (pF) | $\Delta C/C_0$ |
|----------|--------------------------|--------------------------|----------------|
| 1        | 7.6703                   | 8.0273                   | 0.0465         |
| 2        | 7.5768                   | 8.1887                   | 0.0807         |
| 3        | 6.5653                   | 7.1082                   | 0.0826         |
| 4        | 7.0830                   | 7.3301                   | 0.0348         |
| 5        | 8.1048                   | 8.6990                   | 0.0733         |
| 6        | 7.2224                   | 7.2224                   | 0              |
| 7        | 7.2532                   | 7.2532                   | 0              |
| 8        | 7.9840                   | 8.6526                   | 0.0837         |
| 9        | 7.2134                   | 7.4504                   | 0.0328         |
| 10       | 7.5645                   | 8.1699                   | 0.0800         |
| 11       | 7.9935                   | 8.6194                   | 0.0783         |
| 12       | 6.9388                   | 7.1919                   | 0.0364         |
| 13       | 7.5485                   | 7.5485                   | 0              |
| 14       | 7.9100                   | 7.9100                   | 0              |
| 15       | 8.1150                   | 8.1150                   | 0              |
| 16       | 7.0423                   | 7.0423                   | 0              |

**Table S4.** Relative capacitance change at each pixel in the 4×4 microarray by placing the letter “P”.

| Position | Initial capacitance (pF) | Loading capacitance (pF) | $\Delta C/C_0$ |
|----------|--------------------------|--------------------------|----------------|
| 1        | 7.6703                   | 8.2373                   | 0.0739         |
| 2        | 7.5768                   | 8.1564                   | 0.0764         |
| 3        | 6.5653                   | 7.0927                   | 0.0803         |
| 4        | 7.0830                   | 7.6913                   | 0.0858         |
| 5        | 8.1048                   | 8.6099                   | 0.0623         |
| 6        | 7.2224                   | 7.2288                   | 0.0008         |
| 7        | 7.2532                   | 7.7370                   | 0.0666         |
| 8        | 7.9840                   | 7.9840                   | 0              |
| 9        | 7.2134                   | 7.6869                   | 0.0656         |
| 10       | 7.5645                   | 8.1572                   | 0.0783         |
| 11       | 7.9935                   | 8.4194                   | 0.0532         |
| 12       | 6.9388                   | 6.9388                   | 0              |
| 13       | 7.5485                   | 7.5485                   | 0              |
| 14       | 7.9100                   | 7.9100                   | 0              |
| 15       | 8.1150                   | 8.1150                   | 0              |
| 16       | 7.0423                   | 7.0423                   | 0              |
